# Supplementary material for: The Hong Kong Encyclopaedia of Forms and Precedents: Commercial Contracts: General Clauses
Source: Springer Nature journal article supplement (doi:10.1007/s00428-012-1357-1), 2011-01-01
Supplement: MOESM1 [file 8496920]

**Sample parameters affecting the clinical relevance of RNA biomarkers in translational breast cancer research**

Vassiliki Kotoula, Konstantine T. Kalogeras, George Kouvatses, Despoina Televantou, Ralf Kronenwett, Ralph M. Wirtz, George Fountzilas

**ESM\_1:**

**CLINICAL DATA, TUMOR CHARACTERISTICS &  
SUPPLEMENTAL METHODS**

**ESM\_1\_1: Description of standard patient, clinical and tumour phenotypic characteristics in the three matched sample series.** (A) MD and NMD primary infiltrating breast carcinomas; (B) MD and NMD metastatic lymph nodes; (C) primary infiltrating breast carcinomas with paired metastatic lymph nodes. The same parameters are presented for the entire HE10/97 patient cohort.

|                          | A (N=98)       |              | B (N=72)       |              | C (N=93)       |              | entire cohort (N=367) |             |
|--------------------------|----------------|--------------|----------------|--------------|----------------|--------------|-----------------------|-------------|
|                          | median         | range        | median         | range        | median         | range        | median                | range       |
| <b>Age (years)</b>       | 50.4           | 24.4 - 78.0  | 52.3           | 27.6 - 74.5  | 52.3           | 23.8 - 78.0  | 50.4                  | 22.5 - 78   |
|                          | <b>N cases</b> | <b>%</b>     | <b>N cases</b> | <b>%</b>     | <b>N cases</b> | <b>%</b>     | <b>N cases</b>        | <b>%</b>    |
| <b>Menopausal status</b> | <b>98</b>      |              | <b>72</b>      |              | <b>93</b>      |              | <b>358</b>            |             |
| pre                      | 55             | 56.1         | 35             | 48.6         | 47             | 50.5         | 196                   | 53.4        |
| post                     | 43             | 43.9         | 37             | 51.4         | 46             | 49.5         | 171                   | 46.6        |
| <b>Tumor size</b>        | <b>98</b>      |              | <b>72</b>      |              | <b>93</b>      |              | <b>366</b>            |             |
| <2 cm                    | 41             | 41.8         | 32             | 44.4         | 37             | 39.8         | 118                   | 32.2        |
| 2-5 cm                   | 46             | 46.9         | 29             | 40.3         | 43             | 46.2         | 185                   | 50.5        |
| >5 cm                    | 11             | 11.2         | 11             | 15.3         | 13             | 14.0         | 63                    | 17.2        |
| <b>Nodal involvement</b> | <b>98</b>      |              | <b>72</b>      |              | <b>93</b>      |              | <b>366</b>            |             |
| 0-3 nodes                | 27             | 27.5         | 21             | 29.2         | 21             | 22.6         | 94                    | 25.7        |
| ≥4 nodes                 | 71             | 72.5         | 51             | 70.8         | 72             | 77.4         | 272                   | 74.3        |
| <b>Grade</b>             | <b>98</b>      |              | <b>72</b>      |              | <b>93</b>      |              | <b>366</b>            |             |
| I-II                     | 56             | 57.1         | 32             | 44.4         | 43             | 46.2         | 184                   | 50.3        |
| III-Undifferentiated     | 42             | 42.9         | 40             | 55.6         | 50             | 53.8         | 182                   | 49.7        |
| <b>ER IHC</b>            | <b>97</b>      |              | <b>71</b>      |              | <b>92</b>      |              | <b>362</b>            |             |
| negative                 | 19             | 19.6         | 16             | 22.5         | 20             | 21.7         | 110                   | 30.4        |
| positive                 | 78             | 80.4         | 52             | 77.5         | 72             | 78.3         | 252                   | 69.6        |
| <b>PgR IHC</b>           | <b>98</b>      |              | <b>70</b>      |              | <b>90</b>      |              | <b>358</b>            |             |
| negative                 | 34             | 34.7         | 19             | 27.1         | 29             | 32.2         | 133                   | 37.2        |
| positive                 | 64             | 65.3         | 51             | 72.9         | 61             | 67.8         | 225                   | 62.8        |
| <b>HER2 status*</b>      | <b>91</b>      |              | <b>63</b>      |              | <b>87</b>      |              | <b>330</b>            |             |
| negative                 | 68             | 74.7         | 43             | 68.3         | 58             | 66.7         | 231                   | 70          |
| positive                 | 23             | 25.3         | 20             | 31.7         | 29             | 33.3         | 99                    | 30          |
| <b>TREATMENT</b>         | <b>98</b>      |              | <b>72</b>      |              | <b>93</b>      |              | <b>367</b>            |             |
| radiotherapy             | 78             | 79,6         | 45             | 62,5         | 69             | 74,2         | 293                   | 80,5        |
| hormonal treatment       | 93             | 94,9         | 64             | 88,9         | 83             | 89,2         | 330                   | 90,7        |
| E-T-CMF                  | 49             | 50,0         | 30             | 41,7         | 43             | 46,2         | 165                   | 45,0        |
| E-CMF                    | 49             | 50,0         | 42             | 58,3         | 50             | 53,8         | 202                   | 55,0        |
| <b>DFS (months)</b>      |                |              |                |              |                |              |                       |             |
| Mean                     |                | 76,1         |                | 71,8         |                | 71,1         |                       | 72,5        |
| Median                   |                | 88,3         |                | 84,3         |                | 84,5         |                       | 86,0        |
| Std. Deviation           |                | 34,4         |                | 32,5         |                | 32,8         |                       | 34,1        |
| Min - Max                |                | 9.4 - 121.5  |                | 6.1 - 115.7  |                | 4.0 - 115.7  |                       | 3.6 - 126.3 |
| <b>OS (months)</b>       |                |              |                |              |                |              |                       |             |
| Mean                     |                | 86,4         |                | 83,4         |                | 84,5         |                       | 83,6        |
| Median                   |                | 94,2         |                | 86,7         |                | 89,9         |                       | 90,2        |
| Std. Deviation           |                | 25,8         |                | 23,3         |                | 22,7         |                       | 25,6        |
| Min - Max                |                | 19.0 - 122.8 |                | 27.8 - 115.7 |                | 20.9 - 115.7 |                       | 7 - 126.3   |

\*: HER2 IHC 3+ and/or FISH amplified; IHC: immunohistochemistry; DFS: disease free survival; OS: overall survival

## Tissue processing

H&E sections from each tissue block were evaluated for: tumour presence and histologic grade; TCC% in whole sections (TCC\_NMD); TCC% in the areas that were marked for dissection (TCC\_MD); and, for the presence of in situ carcinoma (ISC), hyperplastic lesions and normal breast epithelial components. All histologic components were recorded as continuous variables, as shown in Table [ESM\\_1\\_2](#).

**ESM\_1\_2: Histologic and phenotypic characteristics of primary infiltrative breast carcinomas in sample cohort A (N=98). Numbers represent % of each parameter in whole sections.**

|                   | normal    | hyperplasia | in situ carcinoma |
|-------------------|-----------|-------------|-------------------|
| presence, N cases | <b>58</b> | <b>39</b>   | <b>33</b>         |
| Mean              | 14,4      | 7,3         | 11,5              |
| Median            | 7,5       | 7,5         | 7,5               |
| Std. Deviation    | 14,5      | 5,3         | 12,3              |
| Minimum           | 0,5       | 3,0         | 3,0               |
| Maximum           | 65,0      | 25,0        | 65,0              |

Serial unstained thick sections (10µm) were used for RNA extraction and were processed (a) as NMD sections (whole sections), and (b) for MD, whereby carcinoma tissue areas were dissected manually with thin scalpels from sections placed on slides. The number of sections used in each case (1 – 3) varied according to the corresponding available tissue areas in NMD sections and in MD fragments. As previously evaluated for the RNA extraction method employed in this study, for tissues containing ~70% sectioned cells, 1 section for tissue areas at 5cm<sup>2</sup> yielded the same RNA content with 3 sections of tissue areas at 1.25cm<sup>2</sup> (data not shown). NMD sections and MD tissue fragments were placed into separate Eppendorf tubes and processed for RNA extraction.

## RNA extraction and mRNA expression investigations

The magnetic bead-based method employed (VERSANT Tissue Preparation System, Siemens Healthcare Diagnostics) involves an extra step of DNase I digestion for ensuring the presence of pure RNA and the absence of DNA in the sample. The method was previously validated for yielding molecular templates of adequate quality from FFPE sections for the assessment of gene expression with quantitative real time PCR.

RNA samples were assessed by 1-step reverse-transcription quantitative real-time PCR (RT-qPCR) for the relative expression of the following genes: *ESR1*, *ERBB2*, *MAPT*, *MMP7*, and *RACGAP1*. A transcript of *RPL37A*, (ribosomal protein L37a) was assessed for sample normalization and for the evaluation of RNA content. Details of the FAM-TAMRA labelled Taqman assays for all transcripts, including PCR efficiencies that were calculated as  $E=1^{(10-\text{slope})}$ , are shown in Table [ESM\\_1\\_3](#). SuperScript® III Platinum® One-Step Quantitative RT-PCR System with ROX (Life Technologies) according to the manufacturer's instructions was used. Experiments were performed on an ABI PRISM® 7900HT (Applied Biosystems) with 30 min at 50 °C and 2 min at 95 °C followed by 40 cycles of 15s at 95 °C, and 30s at 60 °C. Paired samples were included in the same run. All samples were run in triplicates and were considered eligible for analysis when *RPL37A* CT (cycle threshold) values were <32 (triplicate mean values). Relative expression levels (relative quantification, RQ) of the target mRNAs were calculated as  $(40 - [\text{mean CT}_{\text{target}} - \text{mean CT}_{\text{RPL37A}}])$  to yield positively correlated numbers and to facilitate comparisons.

*RPL37A* was selected as the endogenous reference because it was initially identified as one among the least variably expressed genes in 399 fresh tissue data sets from breast cancer samples, normal control tissues and non breast cancer tissue samples (e.g. colorectal cancer) by GeneData software packages. Subsequently, *RPL37A* was verified as a stably expressed reference gene in breast cancer by a model-based variance estimation approach [1] using Affymetrix U133A gene expression data sets from 379 breast cancer tumors.

Table ESM\_1\_3

## Taqman assays employed in this study

| gene    | Oligo ID | Oligo sequences 5' - 3'         | Amplicon length (nts) | Assay location                                               | PCR Efficacy in % |
|---------|----------|---------------------------------|-----------------------|--------------------------------------------------------------|-------------------|
| RPL37A# | forward  | TGTGGTTCCTGCATGAAGACA           | 65                    | c. ex 3 - 4<br>NM_000998.4                                   | 86                |
|         | reverse  | GTGACAGCGGAAGTGGTATTGTAC        |                       |                                                              |                   |
|         | probe    | TGGCTGGCGGTGCCTGGA              |                       |                                                              |                   |
| ESR1    | forward  | GCCAAATTGTGTTTGATGGATTAA        | 73                    | 3'-UTR<br>NM_000125.3 and all ESR1<br>alternative mRNAs      | 96                |
|         | reverse  | GACAAAACCGAGTCACATCAGTAATAG     |                       |                                                              |                   |
|         | probe    | ATGCCCTTTTGCCGATGCA             |                       |                                                              |                   |
| ERBB2   | forward  | CCAGCCTTCGACAACCTCTATT          | 87                    | c. ex 27 - 27<br>NM_004448.2 and all ERBB2<br>variants       | 96                |
|         | reverse  | TGCCGTAGGTGTCCCTTTG             |                       |                                                              |                   |
|         | probe    | ACCAGGACCCACCAGAGCGGG           |                       |                                                              |                   |
| MAPT    | forward  | GTGGCTCAAAGGATAATATCAAACAC      | 82                    | c. ex 11-12<br>NM_001123066.3 and all MAPT<br>mRNAs          | 94                |
|         | reverse  | ACCTTGCTCAGGTCAACTGGTT          |                       |                                                              |                   |
|         | probe    | AGACTATTTGCACACTGCCGCCT*        |                       |                                                              |                   |
| MMP7    | forward  | CGGGAGGCATGAGTGAGCTA            | 86                    | c. ex 1 - 2<br>NM_002423.3                                   | 90                |
|         | reverse  | GGCATTGTTTGTCTGAGTCATAGA        |                       |                                                              |                   |
|         | probe    | AGTGGGAACAGGCTCAGGACTATCTCAAGAG |                       |                                                              |                   |
| RACGAP1 | forward  | GAATGTGCGGAATCTGTTTGAG          | 86                    | c. ex 1- 2<br>NM_013277.3, NM_001126103.1,<br>NM_001126104.1 | 98                |
|         | reverse  | TCGCCAACTGGATAAATTGGA           |                       |                                                              |                   |
|         | probe    | ACTGAGAATCTCCACCCGCGCA*         |                       |                                                              |                   |

# = reference gene (endogenous reference); \* = antisense probes; c. = coding

ADDITIONAL REFERENCE, ESM\_1

1. Andersen CL, Jensen JL, Orntoft TF (2004) Normalization of real-time quantitative reverse transcription-PCR data: a model-based variance estimation approach to identify genes suited for normalization, applied to bladder and colon cancer data sets *Cancer research* 64:5245-5250
