# Supplementary material for: The Hong Kong Encyclopaedia of Forms and Precedents: Commercial Contracts: General Clauses
Source: Springer Nature journal article supplement (doi:10.1007/s00428-012-1357-1), 2011-01-01
Supplement: MOESM3 [file 8496920]

**Sample parameters affecting the clinical relevance of RNA biomarkers in translational breast cancer research**

Vassiliki Kotoula, Konstantine T. Kalogeras, George Kouvatses, Despoina Televantou, Ralf Kronenwett, Ralph M. Wirtz, George Fountzilas

**ESM\_3:**

**COMPARISON OF INDIVIDUAL GENE EXPRESSION MARKERS IN PAIRED SAMPLES**

## ESM\_3\_1

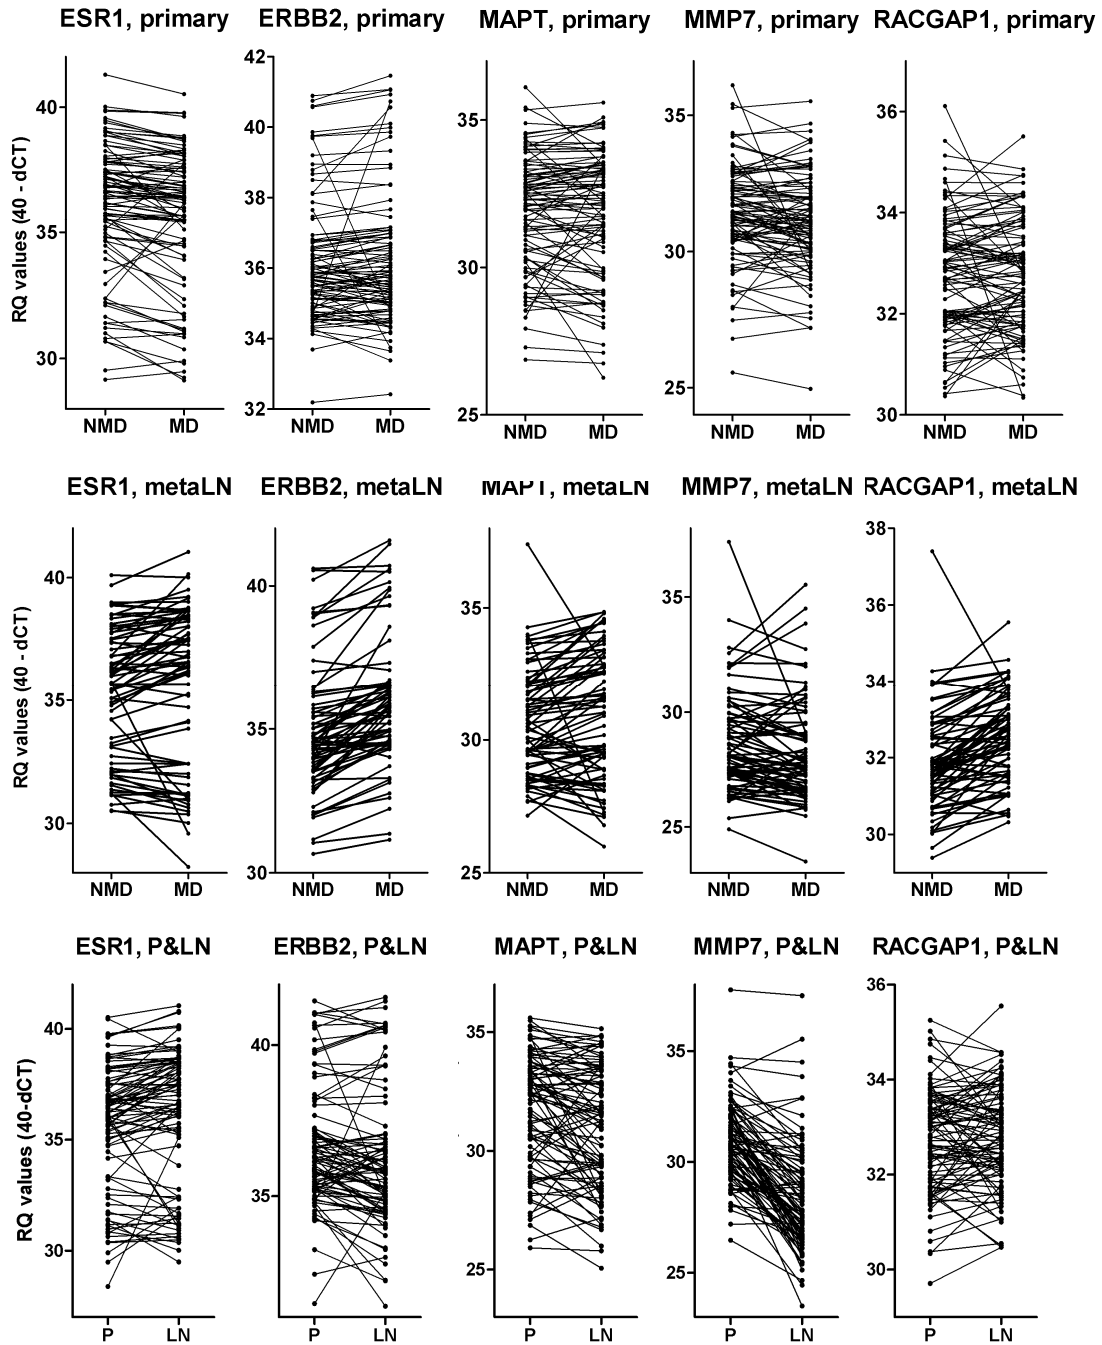

**ESM\_3\_1: Paired mRNA relative quantification (RQ) values obtained upon macrodissection.** Comparison between NMD (non-macrodissected) and MD (macrodissected) samples in primary tumours (P), in metastatic lymph nodes (LN) and in matched P/LN. Negative and positive differences were observed for all targets and were more prominent in lymph node than in primary tumour sample pairs.

## ESM\_3\_2: Relative ESR1, ERBB2, MAPT, MMP7 and RACGAP1 mRNA expression in primary tumours and metastatic lymph nodes.

|                | primary tumors,  |                   | metastatic lymph |                   | matched P & LN, |                  |
|----------------|------------------|-------------------|------------------|-------------------|-----------------|------------------|
|                | RQ <sub>MD</sub> | RQ <sub>NMD</sub> | RQ <sub>MD</sub> | RQ <sub>NMD</sub> | RQ <sub>P</sub> | RQ <sub>LN</sub> |
| <b>ESR1</b>    |                  |                   |                  |                   |                 |                  |
| Mean           | 35,66            | 36,11             | 35,58            | 35,29             | 35,69           | 36,07            |
| Median         | 36,38            | 36,65             | 36,56            | 35,71             | 36,26           | 36,76            |
| Std. Deviation | 2,70             | 2,59              | 3,24             | 2,64              | 2,81            | 3,07             |
| Minimum        | 29,13            | 29,16             | 28,24            | 30,50             | 28,38           | 29,49            |
| Maximum        | 40,52            | 41,29             | 41,04            | 40,10             | 40,52           | 41,04            |
| <i>p</i>       | <0,001           |                   | 0,008            |                   | 0,001           |                  |
| <b>ERBB2</b>   |                  |                   |                  |                   |                 |                  |
| Mean           | 36,22            | 36,17             | 35,97            | 34,90             | 36,61           | 36,28            |
| Median         | 35,69            | 35,79             | 35,76            | 34,52             | 36,26           | 35,87            |
| Std. Deviation | 1,91             | 1,71              | 2,30             | 2,24              | 2,03            | 2,30             |
| Minimum        | 32,42            | 32,19             | 31,15            | 30,66             | 31,45           | 31,36            |
| Maximum        | 41,46            | 40,89             | 41,58            | 40,60             | 41,46           | 41,58            |
| <i>p</i>       | 0,184            |                   | <0,001           |                   | 0,002           |                  |
| <b>MAPT</b>    |                  |                   |                  |                   |                 |                  |
| Mean           | 31,85            | 31,91             | 30,95            | 30,66             | 31,72           | 31,00            |
| Median         | 32,25            | 32,30             | 31,14            | 30,50             | 32,42           | 31,47            |
| Std. Deviation | 2,13             | 1,96              | 2,44             | 2,03              | 2,43            | 2,56             |
| Minimum        | 26,26            | 26,87             | 25,99            | 27,15             | 25,92           | 25,06            |
| Maximum        | 35,59            | 36,11             | 34,85            | 37,40             | 35,59           | 35,14            |
| <i>p</i>       | 0,877            |                   | 0,005            |                   | <0,001          |                  |
| <b>MMP7</b>    |                  |                   |                  |                   |                 |                  |
| Mean           | 31,06            | 31,35             | 28,30            | 28,66             | 30,93           | 28,39            |
| Median         | 31,11            | 31,35             | 27,73            | 28,11             | 30,92           | 27,81            |
| Std. Deviation | 1,77             | 1,78              | 2,23             | 2,16              | 1,78            | 2,42             |
| Minimum        | 24,96            | 25,56             | 23,50            | 24,90             | 26,47           | 23,50            |
| Maximum        | 35,52            | 36,11             | 35,54            | 37,40             | 37,76           | 37,50            |
| <i>p</i>       | 0,016            |                   | 0,006            |                   | <0,001          |                  |
| <b>RACGAP1</b> |                  |                   |                  |                   |                 |                  |
| Mean           | 32,74            | 32,76             | 32,58            | 31,89             | 32,73           | 32,75            |
| Median         | 32,77            | 32,86             | 32,62            | 31,73             | 32,84           | 32,78            |
| Std. Deviation | 1,12             | 1,18              | 1,15             | 1,28              | 1,09            | 1,06             |
| Minimum        | 30,34            | 30,37             | 30,32            | 29,39             | 29,71           | 30,47            |
| Maximum        | 35,51            | 36,11             | 35,55            | 37,40             | 35,25           | 35,55            |
| <i>p</i>       | 0,400            |                   | <0,001           |                   | 0,588           |                  |

NMD: non-macrodiselected; MD: macrodissected; P: primary; LN: metastatic lymph node; delta RQ for P MD/NMD and for LN MD/NMD, (RQ MD) - (RQ NMD); delta RQ for matched P/LN, (RQ mLN) - (RQ mP); *p* : Wilcoxon Signed Ranks Test between paired RQ values.

### ESM\_3\_3

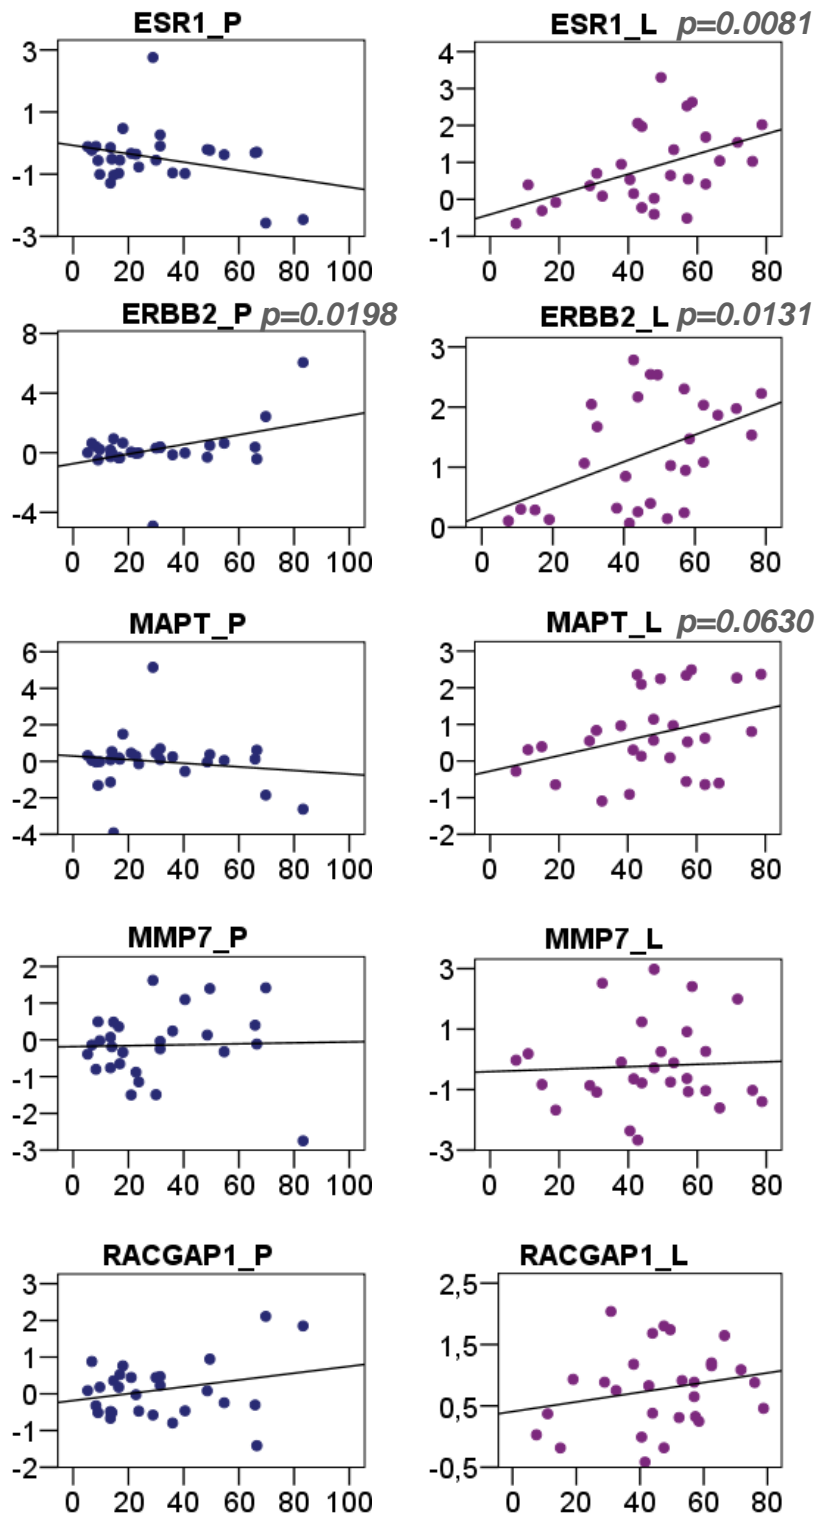

**ESM\_3\_3: Gene expression results vary according to the efficiency of macrodissection in increasing TCC%.** Panel A, primary tumour samples; Panel B, metastatic lymph node samples. Y axes =  $[(TCC\% \text{ MD} - TCC\% \text{ NMD}) \times TCC\% \text{ MD}]$ . X axes =  $\text{deltaRQ} (RQ_{\text{MD}} - RQ_{\text{NMD}})$ . These variables were used to assess the impact of macrodissection in the evaluation of gene expression results in primary (P)

and metastatic lymph node (L) paired samples. Only significant results from this curve fit analysis are noticed. The higher TCC% was obtained upon macrodissection in L samples, the higher RQ values for ESR1, ERBB2 and MAPT expression were obtained. In P, the same was observed for ERBB2 only.

## ESM\_3\_4

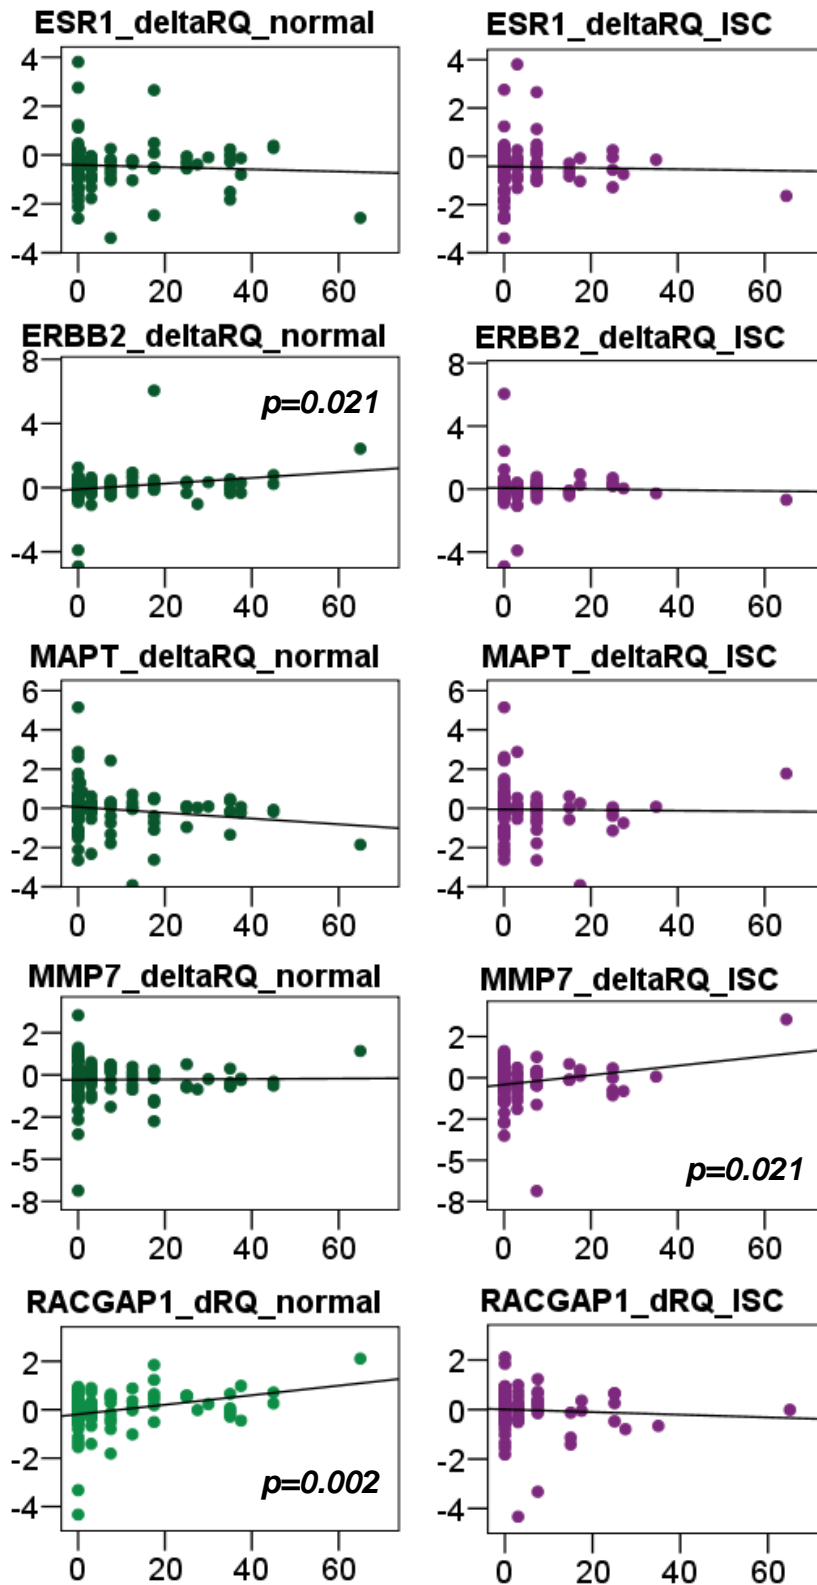

**ESM\_3\_4: Gene expression in macrodissected (MD) and non-macrodissected (NMD) breast carcinomas in relevance to the rate of normal glandular elements and in situ carcinoma (ISC) in whole sections of primary tumours.** Curve fit analysis was applied in order to evaluate whether the percentage of these tissue

components would affect the difference in gene expression (deltaRQ) observed between MD and NMD samples. X axes: percentage of the relevant histologic component (left panel: normal breast epithelial elements; right panel: ISC). Y axes: deltaRQ values ( $RQ_{MD} - RQ_{NMD}$ ). Only significant correlations are noticed. It is shown that the more normal elements were included in the primary tumour tissue section and removed upon MD, the higher RQ values were obtained for ERBB2 and RACGAP1 expression in MD samples in comparison to NMD ones. Accordingly, the larger the ISC area removed upon dissection, the higher MMP7 RQ values were obtained in MD samples in comparison to NMD ones.

**ESM\_3\_5: Association of relative gene expression in macrodissected (MD) and non-macrodissected (NMD) primary tumour samples with diagnostic breast cancer immunohistochemistry (IHC)**

|                                     | ESR1          |               | ERBB2             |                   | MAPT          |                   | MMP7   |        | RACGAP1 |        |
|-------------------------------------|---------------|---------------|-------------------|-------------------|---------------|-------------------|--------|--------|---------|--------|
|                                     | MD            | NMD           | MD                | NMD               | MD            | NMD               | MD     | NMD    | MD      | NMD    |
| <b>ER IHC, negative (N=19)</b>      |               |               |                   |                   |               |                   |        |        |         |        |
| Mean                                | 34,29         | 34,66         | 36,52             | 36,73             | 31,07         | 31,45             | 31,66  | 31,94  | 32,64   | 32,93  |
| Median                              | 34,73         | 34,97         | 35,61             | 35,89             | 31,43         | 31,39             | 31,14  | 31,77  | 32,82   | 32,84  |
| Std. Deviation                      | 3,02          | 2,81          | 2,53              | 2,18              | 2,14          | 2,23              | 1,65   | 1,58   | 1,25    | 1,17   |
| <b>ER IHC, positive (N=78)</b>      |               |               |                   |                   |               |                   |        |        |         |        |
| Mean                                | 35,97         | 36,43         | 36,16             | 36,05             | 32,02         | 32,01             | 30,93  | 31,22  | 32,78   | 32,74  |
| Median                              | 36,45         | 36,84         | 35,73             | 35,78             | 32,48         | 32,35             | 31,08  | 31,31  | 32,77   | 32,88  |
| Std. Deviation                      | 2,54          | 2,43          | 1,75              | 1,56              | 2,10          | 1,90              | 1,79   | 1,81   | 1,08    | 1,18   |
| <i>Mann-Whitney Significance, p</i> | <b>0,0164</b> | <b>0,0047</b> | 0,9059            | 0,4185            | 0,0650        | 0,3263            | 0,2130 | 0,1616 | 0,6892  | 0,5669 |
| <b>PgR IHC, negative (N=34)</b>     |               |               |                   |                   |               |                   |        |        |         |        |
| Mean                                | 35,00         | 35,50         | 36,13             | 36,20             | 30,94         | 31,08             | 31,19  | 31,26  | 32,89   | 33,03  |
| Median                              | 35,95         | 36,28         | 35,51             | 35,75             | 31,44         | 31,27             | 31,20  | 31,15  | 33,07   | 33,05  |
| Std. Deviation                      | 3,24          | 3,04          | 2,18              | 2,04              | 2,21          | 2,07              | 1,97   | 1,94   | 1,21    | 1,07   |
| <b>PgR IHC, positive (N=64)</b>     |               |               |                   |                   |               |                   |        |        |         |        |
| Mean                                | 36,02         | 36,43         | 36,27             | 36,16             | 32,33         | 32,35             | 31,00  | 31,40  | 32,66   | 32,62  |
| Median                              | 36,43         | 36,74         | 35,80             | 35,81             | 32,82         | 32,60             | 31,06  | 31,45  | 32,55   | 32,67  |
| Std. Deviation                      | 2,32          | 2,28          | 1,76              | 1,51              | 1,93          | 1,76              | 1,67   | 1,70   | 1,06    | 1,22   |
| <i>Mann-Whitney Significance, p</i> | 0,2758        | 0,3470        | 0,4645            | 0,7257            | <b>0,0020</b> | <b>0,0043</b>     | 0,5017 | 0,5859 | 0,2019  | 0,0653 |
| <b>HER2 status, negative (N=68)</b> |               |               |                   |                   |               |                   |        |        |         |        |
| Mean                                | 36,11         | 36,61         | 35,57             | 35,46             | 32,25         | 32,38             | 31,10  | 31,43  | 32,74   | 32,72  |
| Median                              | 36,55         | 36,87         | 35,41             | 35,43             | 32,62         | 32,60             | 31,13  | 31,45  | 32,73   | 32,78  |
| Std. Deviation                      | 2,53          | 2,40          | 1,31              | 0,92              | 1,93          | 1,85              | 1,64   | 1,77   | 1,13    | 1,31   |
| <b>HER2 status, positive (N=23)</b> |               |               |                   |                   |               |                   |        |        |         |        |
| Mean                                | 34,26         | 34,55         | 38,05             | 38,22             | 30,52         | 30,46             | 31,08  | 31,31  | 32,74   | 32,98  |
| Median                              | 35,44         | 34,82         | 38,36             | 38,50             | 30,97         | 30,25             | 30,92  | 31,25  | 33,00   | 32,91  |
| Std. Deviation                      | 2,95          | 2,75          | 2,31              | 1,92              | 2,25          | 1,65              | 1,79   | 1,58   | 1,22    | 0,88   |
| <i>Mann-Whitney Significance, p</i> | <b>0,0075</b> | <b>0,0023</b> | <b>&lt;0,0001</b> | <b>&lt;0,0001</b> | <b>0,0007</b> | <b>&lt;0,0001</b> | 1,0000 | 0,7013 | 0,8766  | 0,3611 |



### ESM\_3\_6: Association of relative gene expression in macrodissected (MD) and non-macrodissected (NMD) metastatic lymph node samples with diagnostic breast cancer IHC

|                                     | ESR1          |               | ERBB2         |               | MAPT          |               | MMP7          |        | RACGAP1       |        |
|-------------------------------------|---------------|---------------|---------------|---------------|---------------|---------------|---------------|--------|---------------|--------|
|                                     | MD            | NMD           | MD            | NMD           | MD            | NMD           | MD            | NMD    | MD            | NMD    |
| <b>ER IHC, negative (N=16)</b>      |               |               |               |               |               |               |               |        |               |        |
| Mean                                | 33,35         | 33,94         | 36,72         | 35,51         | 29,71         | 30,18         | 29,07         | 29,30  | 32,85         | 32,01  |
| Median                              | 31,58         | 32,75         | 36,09         | 34,52         | 29,43         | 30,18         | 28,83         | 29,55  | 32,88         | 31,73  |
| Std. Deviation                      | 3,69          | 2,94          | 2,88          | 2,79          | 2,02          | 1,84          | 2,36          | 2,28   | 1,16          | 1,34   |
| <b>ER IHC, positive (N=55)</b>      |               |               |               |               |               |               |               |        |               |        |
| Mean                                | 36,30         | 35,74         | 35,75         | 34,73         | 31,36         | 30,85         | 28,12         | 28,51  | 32,48         | 31,86  |
| Median                              | 36,89         | 36,04         | 35,57         | 34,55         | 31,66         | 30,93         | 27,60         | 28,03  | 32,44         | 31,76  |
| Std. Deviation                      | 2,79          | 2,41          | 2,11          | 2,08          | 2,45          | 2,06          | 2,16          | 2,10   | 1,15          | 1,28   |
| <i>Mann-Whitney Significance, p</i> | <b>0,0054</b> | <b>0,0318</b> | 0,9325        | 0,5775        | <b>0,0056</b> | 0,6829        | 0,5697        | 0,393  | 0,2312        | 0,7    |
| <b>PgR IHC, negative (N=19)</b>     |               |               |               |               |               |               |               |        |               |        |
| Mean                                | 33,18         | 33,63         | 37,04         | 35,77         | 29,50         | 29,81         | 28,95         | 28,85  | 33,14         | 32,32  |
| Median                              | 31,15         | 32,43         | 36,63         | 34,51         | 29,33         | 29,61         | 28,80         | 28,21  | 33,09         | 32,30  |
| Std. Deviation                      | 3,45          | 2,57          | 2,89          | 2,96          | 2,11          | 1,78          | 2,57          | 2,27   | 1,29          | 1,30   |
| <b>PgR IHC, positive (N=51)</b>     |               |               |               |               |               |               |               |        |               |        |
| Mean                                | 36,48         | 35,90         | 35,59         | 34,57         | 31,50         | 30,98         | 28,15         | 28,66  | 32,36         | 31,73  |
| Median                              | 37,00         | 36,15         | 35,57         | 34,53         | 31,66         | 30,93         | 27,78         | 28,07  | 32,39         | 31,63  |
| Std. Deviation                      | 2,66          | 2,37          | 1,98          | 1,89          | 2,36          | 2,01          | 2,08          | 2,15   | 1,04          | 1,27   |
| <i>Mann-Whitney Significance, p</i> | <b>0,0008</b> | <b>0,0033</b> | 0,5028        | 0,8666        | <b>0,0027</b> | 0,1455        | <b>0,0164</b> | 0,7795 | <b>0,0133</b> | 0,0598 |
| <b>HER2 status, negative (N=43)</b> |               |               |               |               |               |               |               |        |               |        |
| Mean                                | 36,84         | 36,31         | 35,23         | 34,24         | 31,65         | 31,34         | 28,61         | 29,15  | 32,35         | 31,78  |
| Median                              | 37,47         | 36,39         | 35,43         | 34,31         | 32,53         | 31,32         | 27,84         | 28,57  | 32,22         | 31,47  |
| Std. Deviation                      | 2,63          | 2,22          | 1,62          | 1,57          | 2,42          | 2,04          | 2,15          | 2,13   | 1,31          | 1,51   |
| <b>HER2 status, positive (N=20)</b> |               |               |               |               |               |               |               |        |               |        |
| Mean                                | 33,75         | 33,52         | 37,83         | 36,76         | 29,64         | 29,54         | 27,87         | 28,00  | 32,95         | 32,12  |
| Median                              | 33,13         | 33,11         | 38,32         | 36,68         | 29,51         | 29,47         | 26,84         | 27,54  | 32,84         | 31,86  |
| Std. Deviation                      | 3,02          | 2,52          | 2,58          | 2,67          | 1,94          | 1,49          | 2,33          | 1,86   | 0,79          | 0,85   |
| <i>Mann-Whitney Significance, p</i> | <b>0,0002</b> | <b>0,0002</b> | <b>0,0087</b> | <b>0,0034</b> | <b>0,0142</b> | <b>0,0047</b> | 0,9827        | 0,6807 | 0,0479        | 0,1012 |

### ESM\_3\_7: Association of relative gene expression in matched primary tumor (mP) and lymph node (mLN) samples with diagnostic breast cancer IHC

|                                     | ESR1          |                   | ERBB2             |                   | MAPT          |               | MMP7          |        | RACGAP1       |               |
|-------------------------------------|---------------|-------------------|-------------------|-------------------|---------------|---------------|---------------|--------|---------------|---------------|
|                                     | mP            | mLN               | mP                | mLN               | mP            | mLN           | mP            | mLN    | mP            | mLN           |
| <b>ER IHC, negative (N=20)</b>      |               |                   |                   |                   |               |               |               |        |               |               |
| Mean                                | 34,16         | 34,26             | 36,94             | 36,73             | 30,40         | 30,15         | 31,62         | 29,50  | 33,15         | 33,00         |
| Median                              | 34,01         | 33,82             | 36,65             | 36,09             | 30,11         | 29,67         | 31,50         | 28,98  | 33,27         | 33,07         |
| Std. Deviation                      | 2,95          | 3,36              | 2,83              | 2,84              | 2,43          | 2,29          | 2,14          | 3,02   | 1,26          | 1,10          |
| <b>ER IHC, positive (N=72)</b>      |               |                   |                   |                   |               |               |               |        |               |               |
| Mean                                | 36,04         | 36,53             | 36,51             | 36,17             | 32,11         | 31,29         | 30,74         | 28,10  | 32,58         | 32,68         |
| Median                              | 36,67         | 37,35             | 36,16             | 35,85             | 32,78         | 31,62         | 30,84         | 27,61  | 32,60         | 32,67         |
| Std. Deviation                      | 2,61          | 2,82              | 1,78              | 2,15              | 2,32          | 2,56          | 1,65          | 2,17   | 0,99          | 1,05          |
| <i>Mann-Whitney Significance, p</i> | <b>0,0062</b> | <b>0,0049</b>     | 0,8056            | 0,7120            | <b>0,0070</b> | 0,0736        | 0,1139        | 0,0490 | <b>0,0382</b> | 0,2150        |
| <b>PgR IHC, negative (N=29)</b>     |               |                   |                   |                   |               |               |               |        |               |               |
| Mean                                | 34,00         | 34,18             | 37,13             | 36,97             | 30,35         | 29,86         | 31,79         | 29,20  | 33,01         | 33,16         |
| Median                              | 33,30         | 32,42             | 36,59             | 36,30             | 30,49         | 29,49         | 31,48         | 29,24  | 33,26         | 33,09         |
| Std. Deviation                      | 3,03          | 3,50              | 2,58              | 2,85              | 2,41          | 2,43          | 1,76          | 2,86   | 1,25          | 1,15          |
| <b>PgR IHC, positive (N=61)</b>     |               |                   |                   |                   |               |               |               |        |               |               |
| Mean                                | 36,37         | 36,87             | 36,36             | 35,98             | 32,38         | 31,57         | 30,56         | 28,08  | 32,55         | 32,55         |
| Median                              | 36,72         | 37,44             | 36,15             | 35,81             | 32,91         | 31,66         | 30,77         | 27,60  | 32,64         | 32,56         |
| Std. Deviation                      | 2,33          | 2,46              | 1,74              | 1,99              | 2,19          | 2,43          | 1,69          | 2,15   | 0,97          | 0,97          |
| <i>Mann-Whitney Significance, p</i> | <b>0,0005</b> | <b>0,0005</b>     | 0,3715            | 0,2218            | <b>0,0003</b> | <b>0,0030</b> | <b>0,0029</b> | 0,0692 | 0,0616        | <b>0,0170</b> |
| <b>HER2 status, negative (N=58)</b> |               |                   |                   |                   |               |               |               |        |               |               |
| Mean                                | 36,31         | 37,06             | 35,88             | 35,38             | 32,09         | 31,58         | 31,12         | 28,52  | 32,73         | 32,64         |
| Median                              | 36,79         | 37,73             | 35,73             | 35,24             | 32,76         | 31,94         | 31,14         | 27,83  | 32,98         | 32,72         |
| Std. Deviation                      | 2,79          | 2,68              | 1,55              | 1,53              | 2,27          | 2,47          | 1,82          | 2,40   | 1,21          | 1,18          |
| <b>HER2 status, positive (N=29)</b> |               |                   |                   |                   |               |               |               |        |               |               |
| Mean                                | 34,44         | 34,16             | 38,18             | 38,30             | 30,51         | 29,51         | 30,82         | 28,55  | 32,75         | 33,04         |
| Median                              | 35,44         | 35,23             | 38,27             | 39,31             | 30,62         | 29,40         | 30,84         | 28,57  | 32,64         | 32,99         |
| Std. Deviation                      | 2,75          | 3,06              | 2,20              | 2,39              | 2,43          | 2,08          | 1,65          | 2,41   | 0,91          | 0,78          |
| <i>Mann-Whitney Significance, p</i> | <b>0,0027</b> | <b>&lt;0.0001</b> | <b>&lt;0.0001</b> | <b>&lt;0.0001</b> | <b>0,0035</b> | <b>0,0003</b> | 0,5584        | 0,9713 | 0,7940        | 0,1350        |

**ESM\_3\_8: Spearman's bivariate correlations of gene expression in paired sample groups.**

|       |          |          | ERBB2    | MAPT              | MMP7              | RACGAP1       |                   |
|-------|----------|----------|----------|-------------------|-------------------|---------------|-------------------|
| P, MD | ESR1     | <i>r</i> | -0,0227  | <b>0,5787</b>     | <b>-0,2256</b>    | 0,0221        |                   |
|       |          | <i>p</i> | 0,8248   | <b>&lt;0.0001</b> | <b>0,0255</b>     | 0,8293        |                   |
|       | ERBB2    | <i>r</i> | 1        | -0,1179           | 0,0531            | 0,2081        |                   |
|       |          | <i>p</i> | .        | 0,2477            | 0,6034            | 0,0398        |                   |
|       | MAPT     | <i>r</i> |          | 1                 | -0,1692           | -0,1107       |                   |
|       |          | <i>p</i> |          | .                 | 0,0958            | 0,2779        |                   |
| MMP7  | <i>r</i> |          |          | 1                 | -0,0064           |               |                   |
|       | <i>p</i> |          |          | .                 | 0,9498            |               |                   |
| N=98  | ESR1     | <i>r</i> | -0,0554  | <b>0,5765</b>     | <b>-0,2758</b>    | 0,0319        |                   |
|       |          | <i>p</i> | 0,5881   | <b>&lt;0.0001</b> | <b>0,0060</b>     | 0,7549        |                   |
|       | ERBB2    | <i>r</i> | 1        | -0,1638           | -0,0527           | 0,1140        |                   |
|       |          | <i>p</i> | .        | 0,1070            | 0,6066            | 0,2635        |                   |
|       | MAPT     | <i>r</i> |          | 1                 | 0,0080            | -0,0833       |                   |
|       |          | <i>p</i> |          | .                 | 0,9378            | 0,4147        |                   |
|       | MMP7     | <i>r</i> |          |                   | 1                 | 0,0383        |                   |
|       |          | <i>p</i> |          |                   | .                 | 0,7084        |                   |
|       | LN, MD   | ESR1     | <i>r</i> | -0,1188           | <b>0,5954</b>     | -0,0900       | -0,1467           |
|       |          |          | <i>p</i> | 0,3204            | <b>&lt;0.0001</b> | 0,4523        | 0,2189            |
|       |          | ERBB2    | <i>r</i> | 1                 | -0,0205           | 0,1595        | <b>0,5469</b>     |
|       |          |          | <i>p</i> | .                 | 0,8642            | 0,1809        | <b>&lt;0.0001</b> |
| MAPT  |          | <i>r</i> |          | 1                 | -0,1405           | -0,1652       |                   |
|       |          | <i>p</i> |          | .                 | 0,2390            | 0,1655        |                   |
| MMP7  | <i>r</i> |          |          | 1                 | -0,0967           |               |                   |
|       | <i>p</i> |          |          | .                 | 0,4189            |               |                   |
| N=72  | ESR1     | <i>r</i> | 0,0091   | <b>0,6183</b>     | -0,0036           | -0,0477       |                   |
|       |          | <i>p</i> | 0,9393   | <b>&lt;0.0001</b> | 0,9758            | 0,6908        |                   |
|       | ERBB2    | <i>r</i> | 1        | 0,0672            | 0,2037            | <b>0,4490</b> |                   |
|       |          | <i>p</i> | .        | 0,5750            | 0,0862            | <b>0,0001</b> |                   |
|       | MAPT     | <i>r</i> |          | 1                 | 0,0719            | 0,0879        |                   |
|       |          | <i>p</i> |          | .                 | 0,5482            | 0,4626        |                   |
|       | MMP7     | <i>r</i> |          |                   | 1                 | -0,0636       |                   |
|       |          | <i>p</i> |          |                   | .                 | 0,5954        |                   |
|       | mP       | ESR1     | <i>r</i> | -0,1118           | <b>0,6088</b>     | -0,1396       | 0,1204            |
|       |          |          | <i>p</i> | 0,2861            | <b>&lt;0.0001</b> | 0,1820        | 0,2503            |
|       |          | ERBB2    | <i>r</i> | 1                 | -0,1078           | 0,0175        | 0,2054            |
|       |          |          | <i>p</i> | .                 | 0,3036            | 0,8678        | 0,0483            |
| MAPT  |          | <i>r</i> |          | 1                 | <b>-0,2537</b>    | -0,0720       |                   |
|       |          | <i>p</i> |          | .                 | <b>0,0141</b>     | 0,4930        |                   |
| MMP7  | <i>r</i> |          |          | 1                 | 0,0988            |               |                   |
|       | <i>p</i> |          |          | .                 | 0,3463            |               |                   |
| N=93  | ESR1     | <i>r</i> | -0,1541  | <b>0,5353</b>     | <b>-0,3001</b>    | -0,0819       |                   |
|       |          | <i>p</i> | 0,1401   | <b>&lt;0.0001</b> | <b>0,0035</b>     | 0,4353        |                   |
|       | ERBB2    | <i>r</i> | 1        | -0,0703           | 0,0526            | <b>0,3896</b> |                   |
|       |          | <i>p</i> | .        | 0,5033            | 0,6165            | <b>0,0001</b> |                   |
|       | MAPT     | <i>r</i> |          | 1                 | <b>-0,3400</b>    | -0,1527       |                   |
|       |          | <i>p</i> |          | .                 | <b>0,0009</b>     | 0,1440        |                   |
|       | MMP7     | <i>r</i> |          |                   | 1                 | -0,0323       |                   |
|       |          | <i>p</i> |          |                   | .                 | 0,7589        |                   |

*r* : Correlation Coefficient; *p* : 2-tailed significance; **blue**: strong correlations preserved in matched sample groups; **red**: strong correlations not preserved in matched groups
