# Supplementary material for: The Hong Kong Encyclopaedia of Forms and Precedents: Commercial Contracts: General Clauses
Source: Springer Nature journal article supplement (doi:10.1007/s00428-012-1357-1), 2011-01-01
Supplement: MOESM5 [file 8496920]

**Sample parameters affecting the clinical relevance of RNA biomarkers in translational breast cancer research**

Vassiliki Kotoula, Konstantine T. Kalogeras, George Kouvatses, Despoina Televantou, Ralf Kronenwett, Ralph M. Wirtz, George Fountzilas

**ESM\_5:**

**EFFECT OF TCC% AND SAMPLE SITE ON THE PROGNOSTIC SIGNIFICANCE OF INDIVIDUAL AND CLUSTERED RNA MARKERS**

**ESM\_5\_1: Cluster discrimination efficacy for DFS and OS.**

Note that the C-index is similar for the same end-point between paired sample groups.

|                       | <i>C-Index</i> | <i>Lower<br/>95%CL</i> | <i>Upper<br/>95%CL</i> |
|-----------------------|----------------|------------------------|------------------------|
| <b>P, MD DFS</b>      | 0,72           | 0,37                   | 0,99                   |
| <b>P, MD OS</b>       | 0,66           | 0,24                   | 1,01                   |
| <b>P, NMD DFS</b>     | 0,79           | 0,46                   | 1,02                   |
| <b>P, NMD OS</b>      | 0,67           | 0,25                   | 1,01                   |
| <b>LN, MD DFS</b>     | 0,72           | 0,30                   | 1,03                   |
| <b>LN, MD OS</b>      | 0,75           | 0,23                   | 1,12                   |
| <b>LN, NMD DFS</b>    | 0,67           | 0,26                   | 1,00                   |
| <b>LN, NMD OS</b>     | 0,67           | 0,14                   | 1,08                   |
| <b>matched P DFS</b>  | 0,88           | 0,58                   | 1,06                   |
| <b>matched P OS</b>   | 0,86           | 0,46                   | 1,08                   |
| <b>matched LN DFS</b> | 0,80           | 0,48                   | 1,02                   |
| <b>matched LN OS</b>  | 0,73           | 0,30                   | 1,04                   |

DFS = disease-free survival; OS = overall survival

**ESM\_5\_2**

**A**

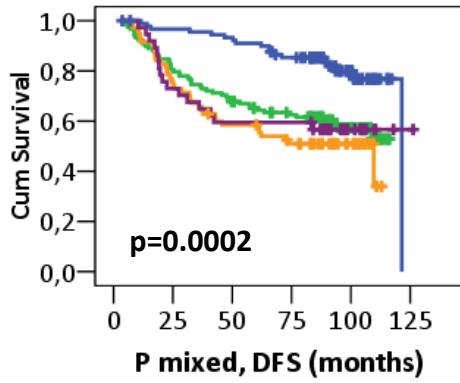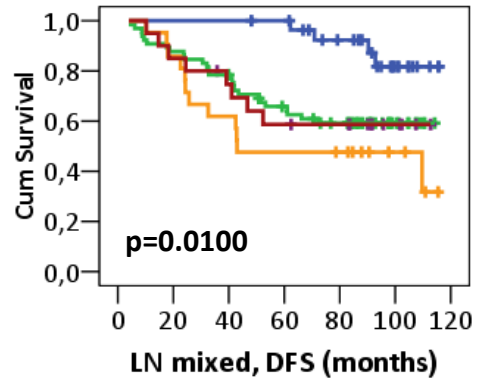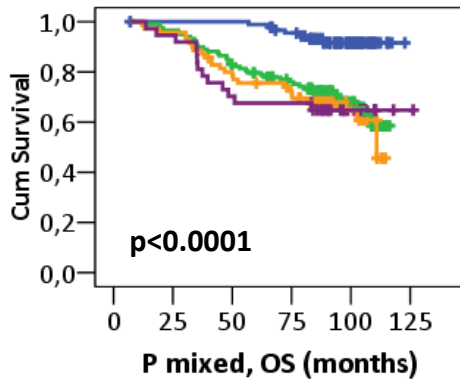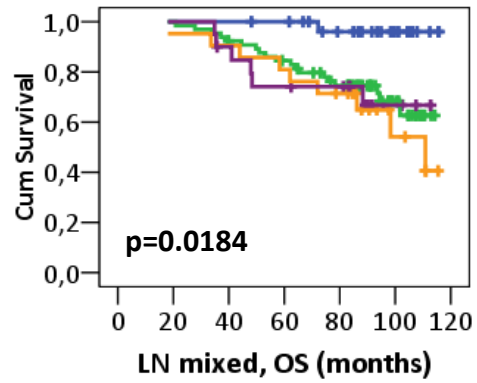

**B**

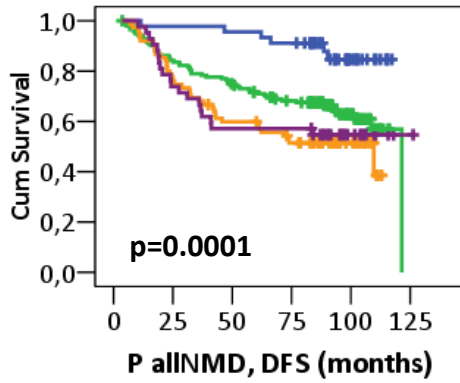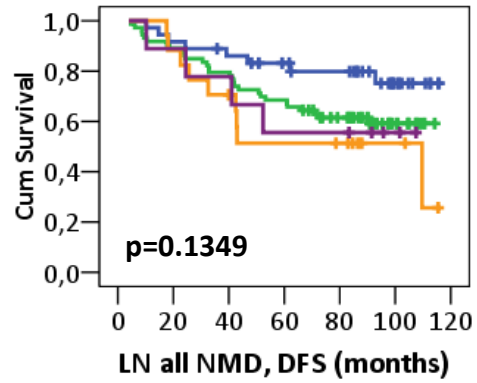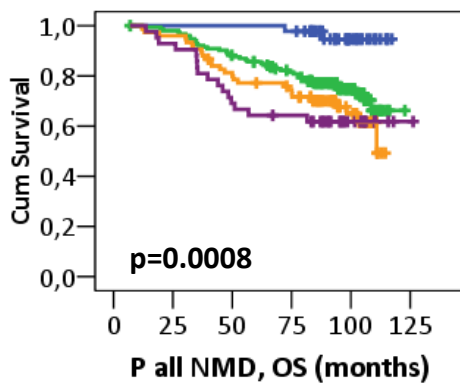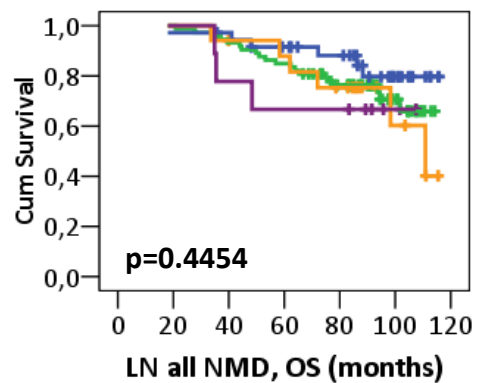

**ESM\_5\_2: Performance of the 4-cluster model in the entire primary (n=307) and lymph node (n=135) series from the HE10/97 project.** In **A**, clusters were analyzed in primary tumour (P) and metastatic lymph node (LN) samples containing the highest possible TCC% (>28%). In **B**, P and LN samples from whole sections only were analyzed. The difference in cluster performance is obvious for the LN group, according to the detailed results presented. By contrast, cluster performance was not influenced by TCC% in primary tumours. **Blue: LumA; Green: LumB; Purple: HER2; Orange: TN.**

**ESM\_5\_3: Multivariate COX regression analysis in paired sample groups.**

| sample group | Label                                  | disease free survival |            |            | overall survival |            |            |
|--------------|----------------------------------------|-----------------------|------------|------------|------------------|------------|------------|
|              |                                        | Hazard Ratio          | 95% CI     | Pr > ChiSq | Hazard Ratio     | 95% CI     | Pr > ChiSq |
| P-MD         | cluster, Lum B vs. LumA                | 6.135                 | 2.40-15.70 | 0.0002     | 14.854           | 4.17-52.92 | <.0001     |
|              | hormonal therapy, yes vs. no           | 0.166                 | 0.05-0.56  | 0.0036     | 0.069            | 0.02-0.29  | 0.0003     |
|              | tumor size >5cm vs. ≤2cm*              | 6.746                 | 1.86-24.50 | 0.0037     | 26.764           | 5.84-122.6 | <.0001     |
|              | HER2 status, positive vs. negative^    | 4.399#                | 1.56-12.41 | 0.0051     | 5.324#           | 1.39-20.46 | 0.0149     |
|              | post- vs. pre-menopausal               | n.a.                  | n.a.       | n.a.       | 4.004            | 1.47-10.94 | 0.0068     |
|              | E-CMF vs. E-T-CMF                      | n.a.                  | n.a.       | n.a.       | 3.415            | 1.23-9.50  | 0.0187     |
| P-NMD        | cluster, Lum B vs. LumA                | 2.564                 | 0.91-7.19  | 0.0734     | 15.61            | 1.95-125.1 | 0.0097     |
|              | hormonal therapy, yes vs. no           | 0.137                 | 0.04-0.42  | 0.0005     | 0.111            | 0.03-0.42  | 0.0013     |
|              | tumor size, >5cm vs. ≤2cm*             | 5.447                 | 1.65-18.02 | 0.0055     | 13.315           | 3.22-55.06 | 0.0004     |
|              | HER2 status, positive vs. negative^    | 2.688#                | 1.02-7.11  | 0.0463     | n.a.             | n.a.       | n.a.       |
|              | cluster, triple negative vs. Lum A     | n.a.                  | n.a.       | n.a.       | 21.547           | 2.01-230.8 | 0.0112     |
|              | E-CMF vs. E-T-CMF                      | n.a.                  | n.a.       | n.a.       | 2.935            | 1.14-7.54  | 0.0254     |
| LN-MD        | lymph node status, ≥4 vs. 0-3 positive | 5.151                 | 1.20-22.13 | 0.0276     | n.a.             | n.a.       | n.a.       |
|              | cluster, Lum B vs. LumA                | n.a.                  | n.a.       | n.a.       | 6.993            | 1.63-30.07 | 0.009      |
|              | cluster, HER2 enriched vs. LumA        | n.a.                  | n.a.       | n.a.       | 9.225&           | 1.88-45.24 | 0.0062     |
|              | HER2 status, positive vs. negative^    | n.a.                  | n.a.       | n.a.       | 0.231#           | 0.06-0.95  | 0.0418     |
| LN-NMD       | cluster, HER2 enriched vs. LumA        | 3.412&                | 1.22-9.54  | 0.0194     | 18.594&          | 3.40-101.6 | 0.0007     |
|              | lymph node status, ≥4 vs. 0-3 positive | 4.477                 | 1.02-19.57 | 0.0464     | n.a.             | n.a.       | n.a.       |
|              | cluster, triple negative vs. Lum A     | n.a.                  | n.a.       | n.a.       | 10.083           | 2.15-47.21 | 0.0033     |
|              | HER2 status, positive vs. negative^    | n.a.                  | n.a.       | n.a.       | 0.205#           | 0.05-0.81  | 0.0238     |
| matched P    | lymph node status, ≥4 vs. 0-3 positive | 3.956                 | 1.21-12.97 | 0.0233     | 3.855            | 0.89-16.72 | 0.0714     |
| matched LN   | lymph node status, ≥4 vs. 0-3 positive | 3.956                 | 1.21-12.97 | 0.0233     | n.a.             | n.a.       | n.a.       |
|              | cluster, Lum B vs. Lum A               | n.a.                  | n.a.       | n.a.       | 13.937           | 1.79-108.6 | 0.0119     |
|              | cluster, HER2 enriched vs. Lum A       | n.a.                  | n.a.       | n.a.       | 9.734&           | 1.13-83.68 | 0.0381     |
|              | cluster, triple negative vs. Lum A     | n.a.                  | n.a.       | n.a.       | 15.734           | 1.59-155.7 | 0.0184     |
| total P      | lymph node status, ≥4 vs. 0-3 positive | 3.191                 | 1.74-5.84  | 0.0002     | 3.062            | 1.46-6.40  | 0.0029     |
|              | hormonal therapy, yes vs. no           | 0.553                 | 0.31-0.99  | 0.0461     | 0.487            | 0.26-0.92  | 0.027      |
|              | HER2 status, positive vs. negative^    | 2.069                 | 1.18-3.64  | 0.0117     | 2.057            | 1.08-3.93  | 0.0292     |
| total LN     | lymph node status, ≥4 vs. 0-3 positive | 2.91                  | 1.15-7.39  | 0.0247     | 3.09             | 0.93-10.21 | 0.0645     |

\*: comparisons for tumor size >5cm vs. >2-5cm were insignificant; ^: HER2 status was always determined in primary tumors; #: HER2 status was an unfavorable prognosticator in primary tumours but a favorable one in the LN MD/NMD sample cohort; &: by contrast, the HER2-enriched cluster was an unfavourable prognostic factor in the LN MD/NMD group
